# Supplementary material for: ERECTA Modulates Seed Germination and Fruit Development via Auxin Signaling in Tomato
Source: MDPI journal article supplement (doi:10.3390/ijms25094754), 2024-04-26
Supplement: s1 [file s1]

**Supplementary Table 1.** Primer list used in this research.

| Target gene        | Primer name   | Sequence(5'-3')           |
|--------------------|---------------|---------------------------|
| For qPCR           |               |                           |
| <i>SIUbiquitin</i> | SIUbiquitin-F | CACCAAGCCAAAGAAGATCA      |
|                    | SIUbiquitin-R | TCAGCATTAGGGCACTCCTT      |
| <i>SIYUC1</i>      | YUC1-F        | TGGACATTGGTGCAATTGGAA     |
|                    | YUC1-R        | AGCCAGTAGCAAGAAGAACAGA    |
| <i>SIYUC3</i>      | YUC3-F        | TGGCCCTGTAATTGTTGGTG      |
|                    | YUC3-R        | GCCACAGTGATGCGATACAG      |
| <i>SIYUC4</i>      | YUC4-F        | CGTCCCGACTCGGATTAGAT      |
|                    | YUC4-R        | GCGTTCCAACGTCAAGTACA      |
| <i>SIYUC5</i>      | YUC5-F        | ATGGCTTGTGCTTGCTACTG      |
|                    | YUC5-R        | CAACCAACGACCACCACTTT      |
| <i>SIYUC6</i>      | YUC6-F        | TGGCAACATTTGATAATCATGTAGA |
|                    | YUC6-R        | TGCAGATGTAGCAAGACCAC      |
| <i>SIYUC7</i>      | YUC7-F        | TGGAGAAATACAAGAAATTGATTG  |
|                    | YUC7-R        | AATCCAAGTGCATATAAACCAGC   |
| <i>SIARF2A</i>     | ARF2A-F       | GTGTCGGAATAGTTGATGCTGATAC |
|                    | ARF2A-R       | TACACCAGCTCACCCCTCTCGC    |
| <i>SIARF2B</i>     | ARF2B-F       | GCTTGTGACAGTGCCATGTG      |
|                    | ARF2B-R       | TGCTGGTCTGAAGCTTGTT       |
| <i>SIARF5</i>      | ARF5-F        | CCTCAGAGTTTGTCAATTCCT     |
|                    | ARF5-R        | AACATCATTCCAAATCTCATACC   |
| <i>SIARF6A</i>     | ARF6A-F       | CCAACATATCCCTAGTACTTCAG   |
|                    | ARF6A-R       | GTGCCTGAGATATTAGTTGGT     |
| <i>SIARF7</i>      | ARF7-F        | AGACGTTACTCGCTACA         |
|                    | ARF7-R        | ACTTCAGCGCAAGACA          |
| <i>SIARF8B</i>     | ARF8B-F       | GTCAGTCCGTGATCATAGAG      |
|                    | ARF8B-R       | GGAATCCAAGCTACAATTTCC     |
| <i>SIABI3</i>      | ABI3-F        | ATCCAAAAGCTGCCCCCTTT      |
|                    | ABI3-R        | TAGCACAAGTGCCCCAACCT      |
| <i>SIABI5</i>      | ABI5-F        | GGGAAATGTTTCGTTGGAGA      |
|                    | ABI5-R        | TGTATGTTGCACCCGTTGTT      |
| <i>SIER</i>        | ER-F          | ACAACAATTTATCAGGCGATG     |
|                    | ER-R          | CTAGAGAAATTATTGCCGGTT     |

|                |          |                          |
|----------------|----------|--------------------------|
| <i>SIERL1</i>  | ERL1-F   | GCAGTTAAGCGACTTTACACC    |
|                | ERL1-R   | CAATCTTCAGACGTGTTTCCC    |
| <i>SIIAA9</i>  | IAA9-F   | TAGATGCTTTACCTGATTACGACA |
|                | IAA9-R   | TGCAGACAAACTCCAATATCAAAC |
| For Sequencing |          |                          |
| <i>SIER</i>    | ER436-R  | AATGATGCCATGGTAGACTCA    |
|                | ER782-R  | TACAACACATTCTCCACGTC     |
|                | ER1094-F | CACATTATAGACTATGCCTGT    |
|                | ER1384-R | CTAACAATCTCGGAAAGCA      |
|                | ER1750-F | TTTATTCATATAGGGGACTGC    |
|                | ER2402-F | GAGCTGCAATATGTTGAGTGG    |
|                | ER2726-F | CATTTGTTTGATTATTTAGCCTT  |
|                | ER3269-F | TTATCGAAGTTACCGTCCA      |
|                | ER3946-F | AATTTAAGGAGCATCATGGAG    |
|                | ER4438-F | ACAACAATTTATCAGGCGATG    |
|                | ER4719-F | CTTTTGCTATGTCTCCGAA      |
|                | ER5551-F | ATGGCACTTCATGTTTACGAG    |
|                | ER6006-F | TGTAGCCCTCGAATAATCCAC    |
|                | ER6401-F | TAACTAAGGCAGCAAACGA      |

**Supplementary Table 2.** Correspondence table of *YUC* and *FZY* genes analyzed in this research.

| <i>YUC</i>  | gene ID        | <i>FZY</i>  |
|-------------|----------------|-------------|
| <i>YUC1</i> | Solyc06g008050 | <i>FZY4</i> |
| <i>YUC2</i> | Solyc06g065630 | <i>FZY1</i> |
| <i>YUC3</i> | Solyc06g083700 | <i>FZY5</i> |
| <i>YUC4</i> | Solyc08g068160 | <i>FZY2</i> |
| <i>YUC6</i> | Solyc09g074430 | <i>FZY6</i> |
| <i>YUC7</i> | Solyc09g091090 | <i>FZY3</i> |

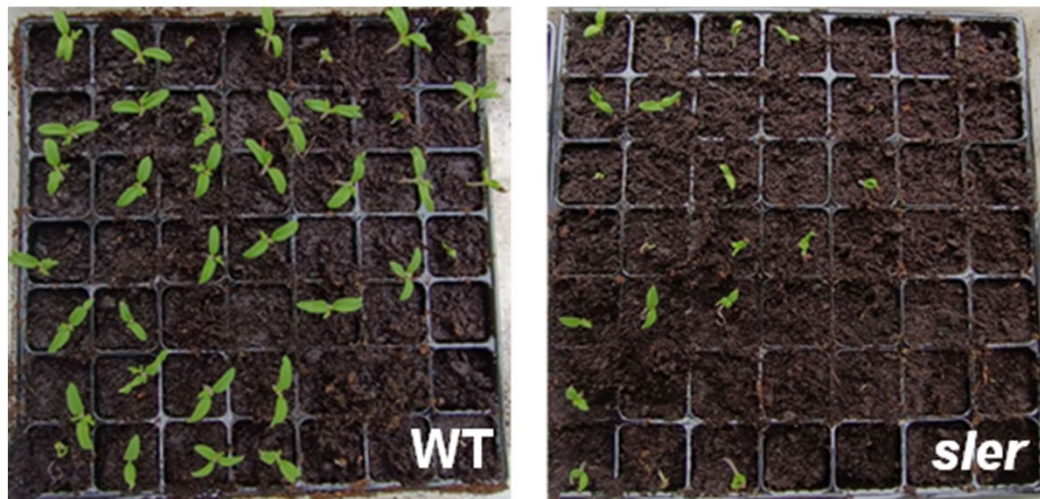

**Supplementary Figure 1.** The state of seed germination in the soil. The germination rates of WT and *sler* seeds were 75.5% and 38.8% respectively.

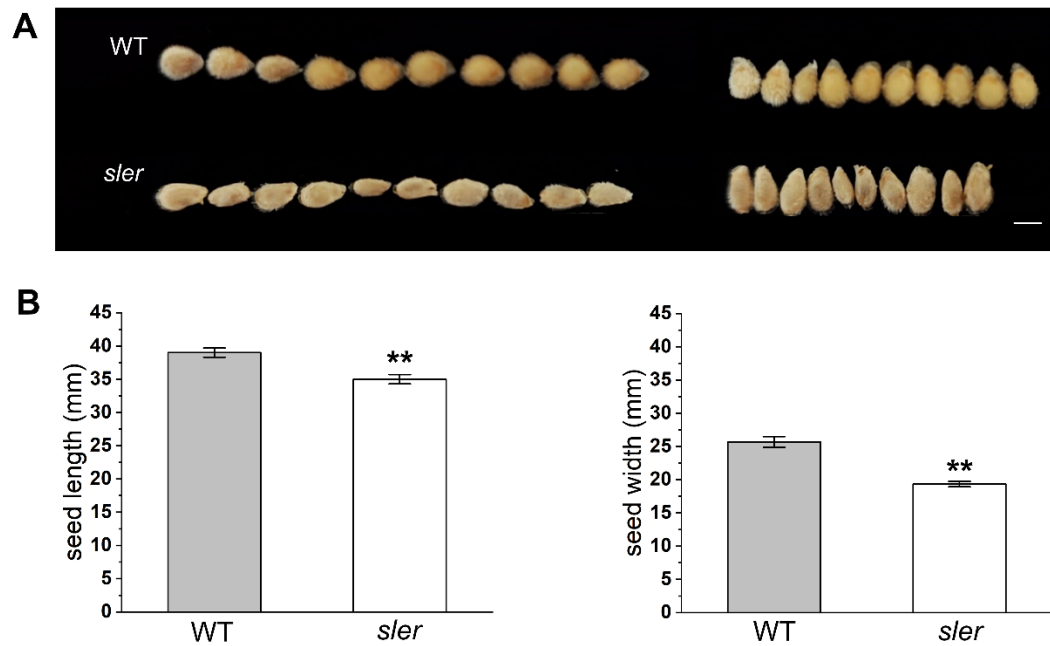

**Supplementary Figure 2.** Seed size of Micro-Tom WT and *slr*. Seed fullness of WT and *slr* (A), bar=2 mm. Seed length and width (B). Ten seeds were considered as one biological replicate. Error bars represent the standard deviations. Significant differences were determined by two-tailed Student's *t* test (\*\*, 0.001<P < 0.01), n=3.

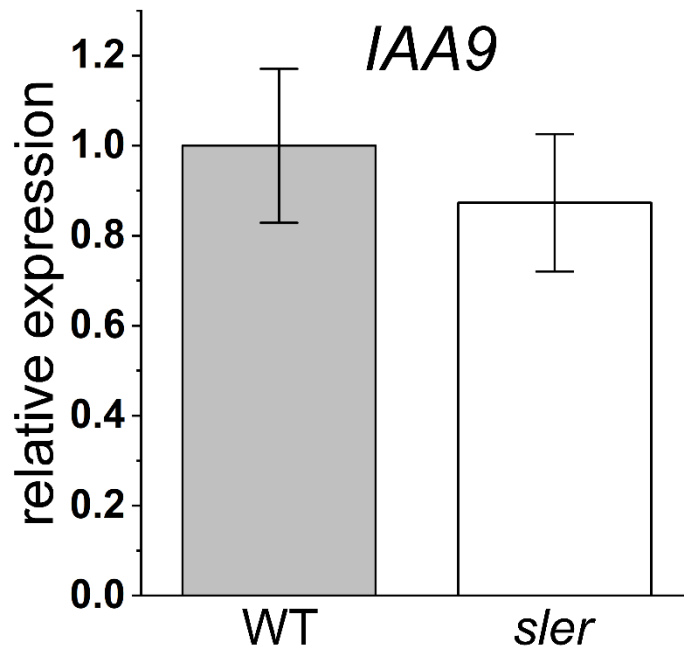

**Supplementary Figure 3.** Relative expression of *IAA9* between WT and *sler* ovary in DAF0. Error bars represent the standard deviations. Significant differences were determined by two-tailed Student's *t* test. *n*=3.

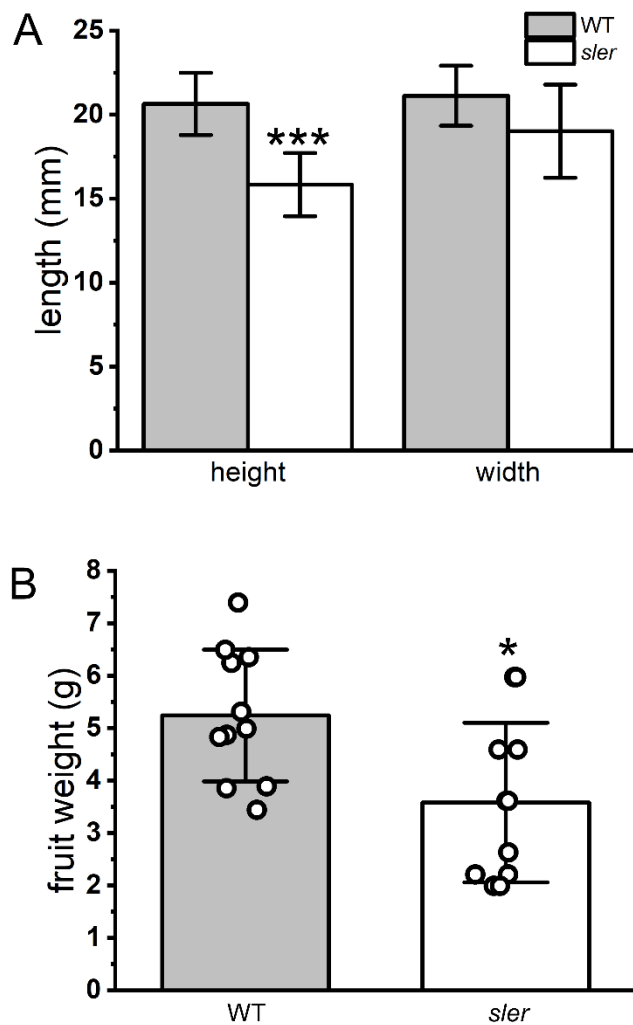

**Supplementary Figure 4.** Fruit size and weight of WT and *sler*. Fruit height and width of WT and *sler* (A). Fruit weight of WT and *sler* (B). Error bars represent the standard deviations. Significant differences were determined by two-tailed Student's *t* test(\*,  $P < 0.05$ ; \*\*\*,  $P < 0.001$ ).  $n=10$ .
